# Supplementary material for: Dissecting the Genetic Basis of a Complex cis-Regulatory Adaptation
Source: PubMed Central journal article supplement (PMC4694769; doi:10.1371/journal.pgen.1005751), 2015-12-29

**A**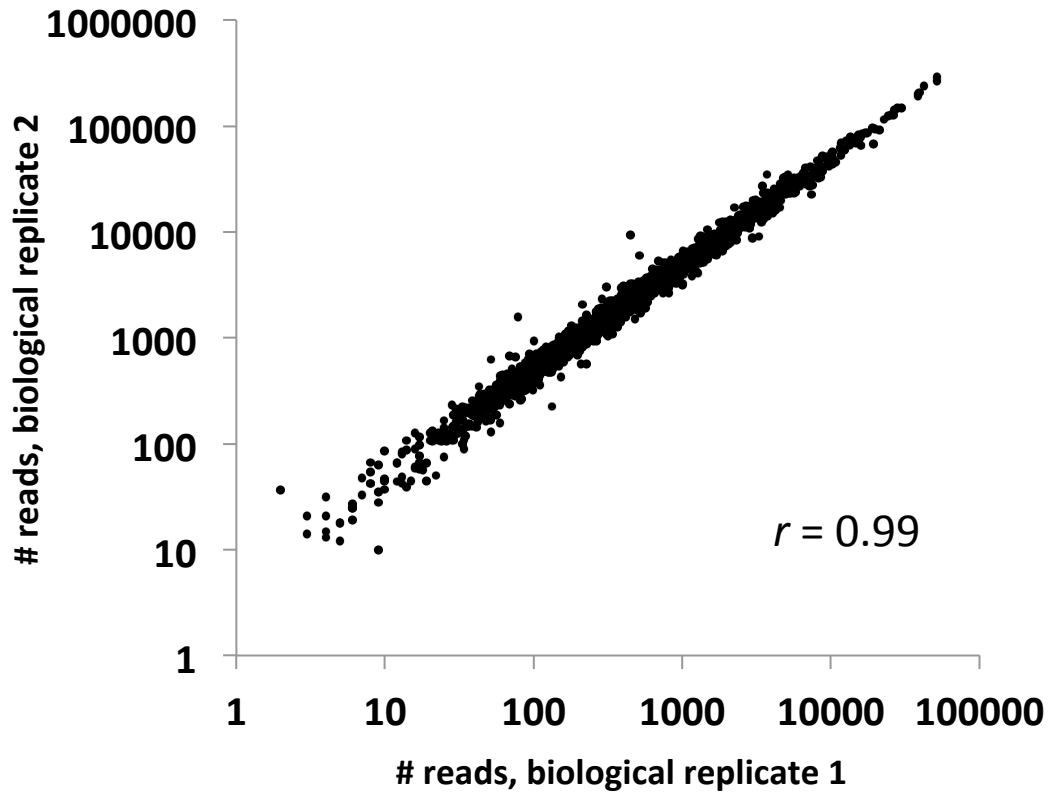**B**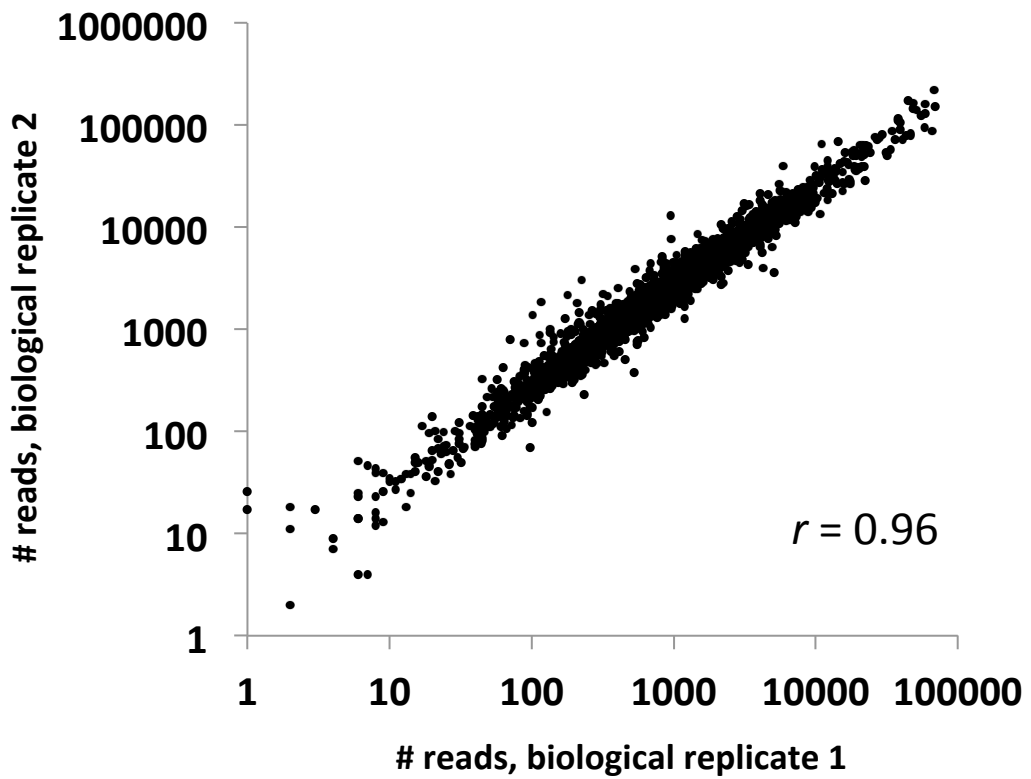

Supplement: pgen.1005751.s001.pdf [file pgen.1005751.s001.pdf]
